# Supplementary material
Source: PubMed Central journal article supplement (PMC7662795)
Supplement: ee9-2-e020-s001.pdf [file ee9-2-e020-s001.pdf]

## Supplemental Material

Spatial Variations in the estimated production of Reactive Oxygen Species by PM<sub>2.5</sub> iron and copper in the Epithelial Lung Lining Fluid

Scott Weichenthal\*<sup>1,2</sup>, Maryam Shekarrizfard<sup>3</sup>, Ryan Kulka<sup>2</sup>, Pascale S.J. Lakey<sup>4</sup>, Kenan Al-Rijleh<sup>3</sup>, Sabreena Anowar<sup>3</sup>, Manabu Shiraiwa<sup>4</sup>, Marianne Hatzopoulou<sup>3</sup>

<sup>1</sup>McGill University, Department of Epidemiology, Biostatistics and Occupational Health, Montreal, Quebec H3A 1A2, Canada

<sup>2</sup>Air Health Science Division, Health Canada, Ottawa, Ontario K1A 0K9, Canada

<sup>3</sup>University of Toronto, Department of Civil Engineering, Toronto, Ontario, M5S 1A4, Canada

<sup>4</sup>University of California Irvine, Department of Chemistry, Irvine CA 92697, USA

\*Corresponding Author

Scott Weichenthal  
Faculty of Medicine  
Department of Epidemiology, Biostatistics, and Occupational Health  
McGill University  
1020 Pines Ave. West  
Montreal, QC H3A 1A2, Canada  
Email: scott.weichenthal@mcgill.ca  
Tel: (514) 398-1584

**Figure S1.** Locations of summer (n=67; August/September, 2016) and winter (n=42; February/March, 2017) monitoring sites in Toronto, Canada. Twenty-eight sites were monitored during both seasons. Land use and traffic data were only available for locations within the boundaries of the city of Toronto.

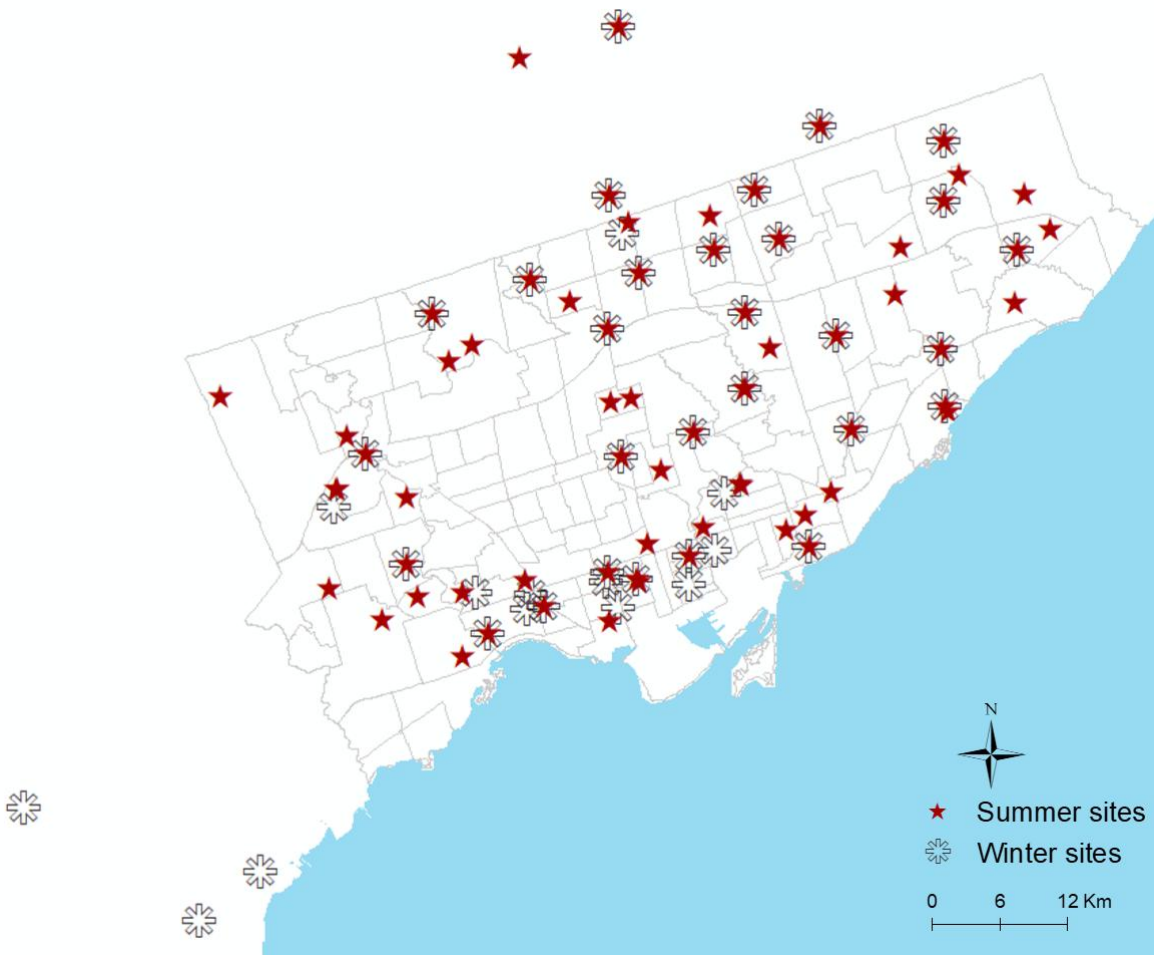

**Figure S2.** Boxplots for the ratio of summer and winter concentrations of PM<sub>2.5</sub>, Fe, Cu, and ROS for sites with both summer and winter data in Toronto, Canada (n=28). The red line indicates a ratio of 1:1.

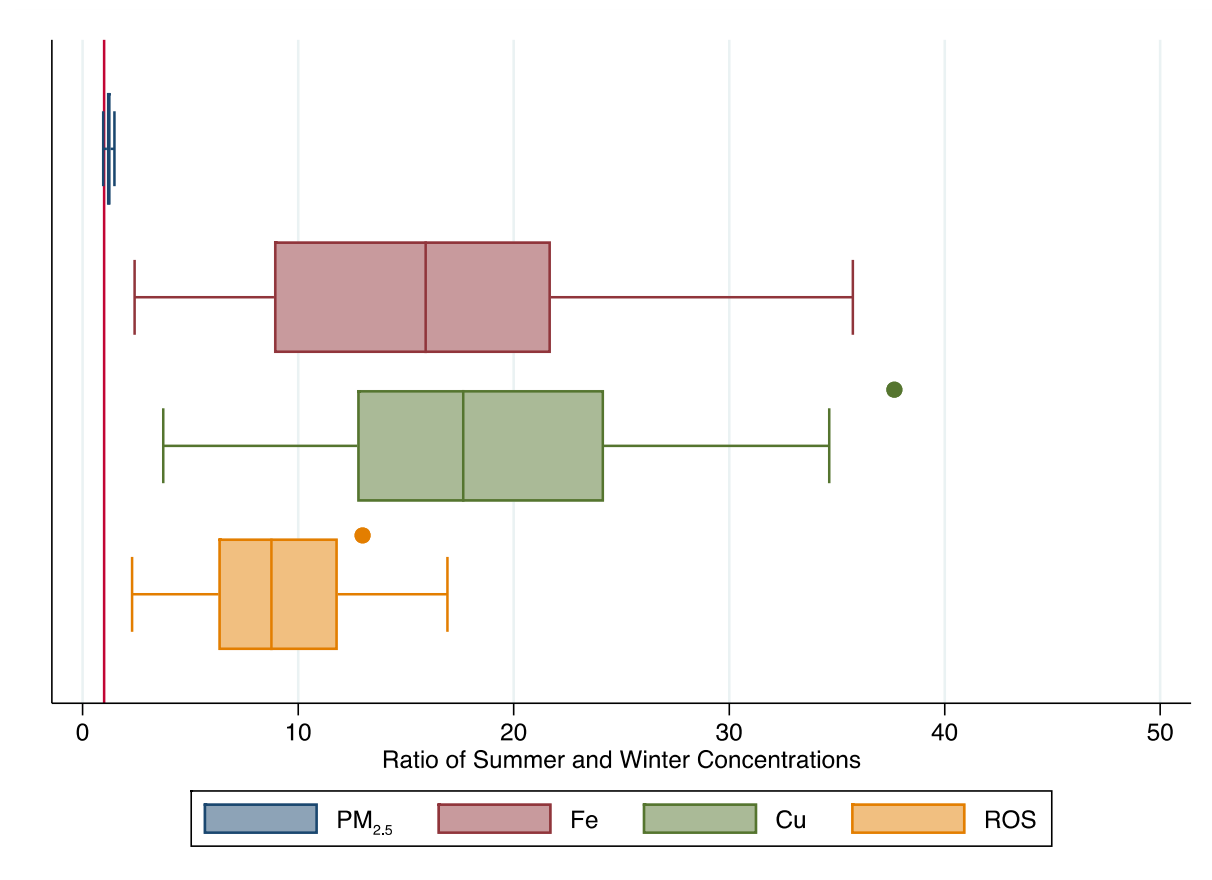

Figure S3. Correlations between PM<sub>2.5</sub> metals during winter

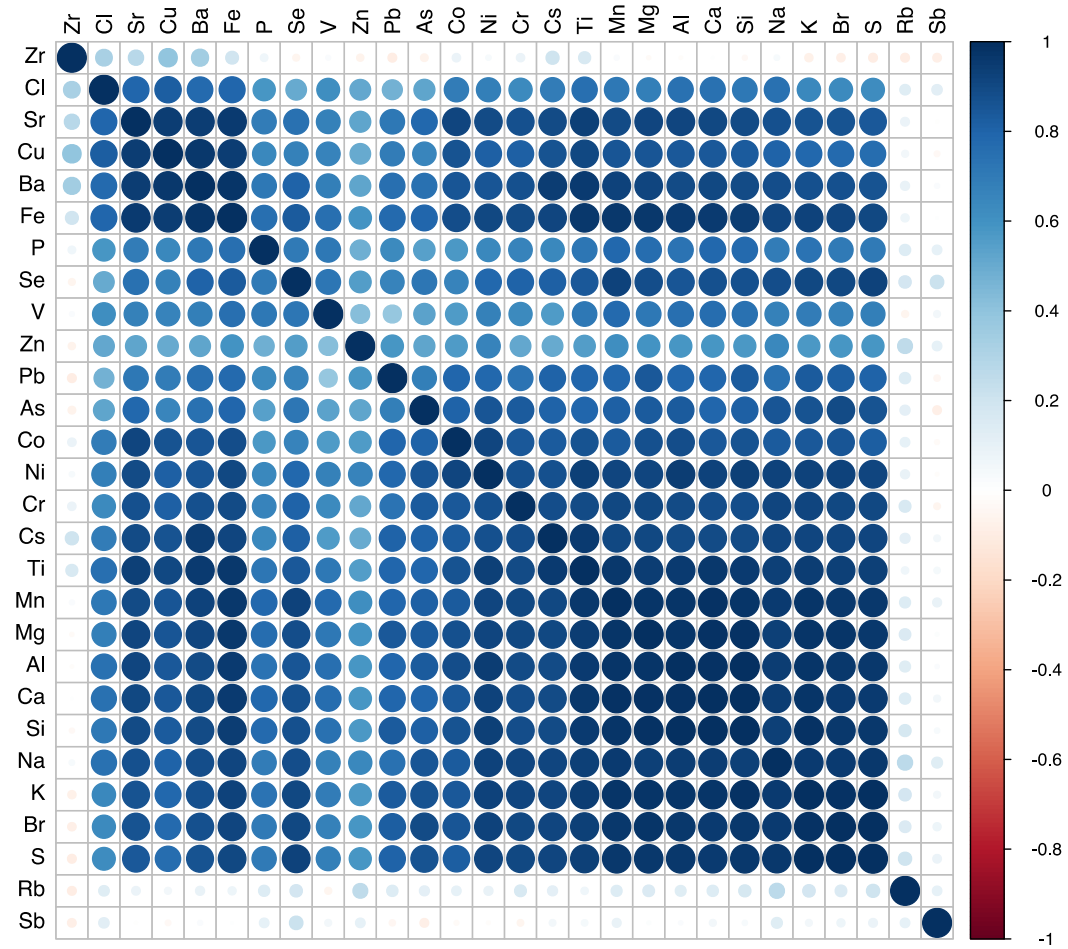

1 **Figure S4.** Estimated concentrations of specific (A) and total (B) ROS generated by PM<sub>2.5</sub> during  
2 summer and winter in Toronto using the KM-SUB-ELF Model. Vertical lines indicate uncertainty  
3 bars.  
4

5 **A)**

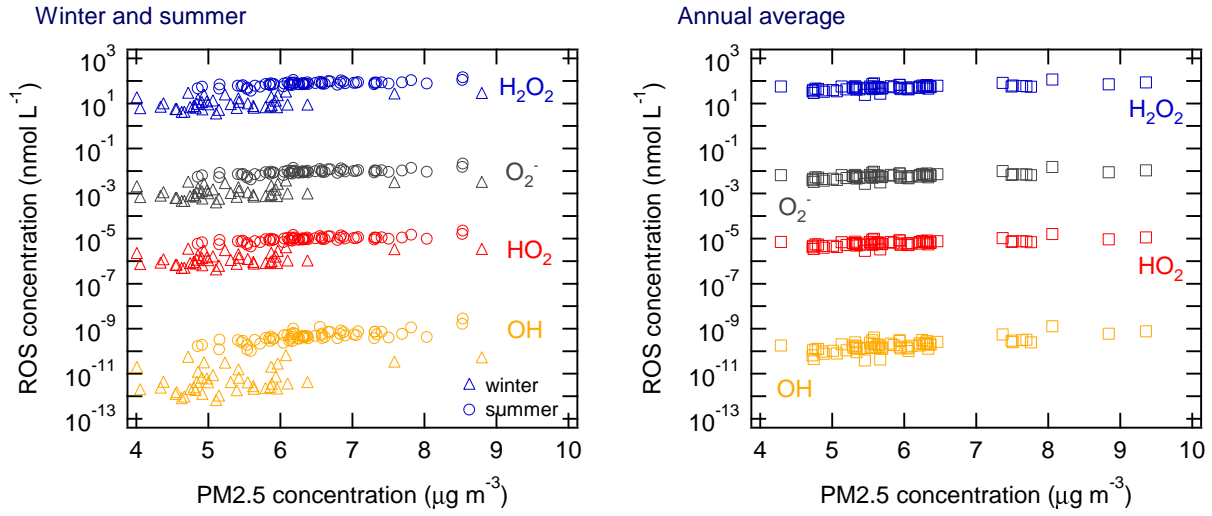

6  
7  
8 **B)**  
9

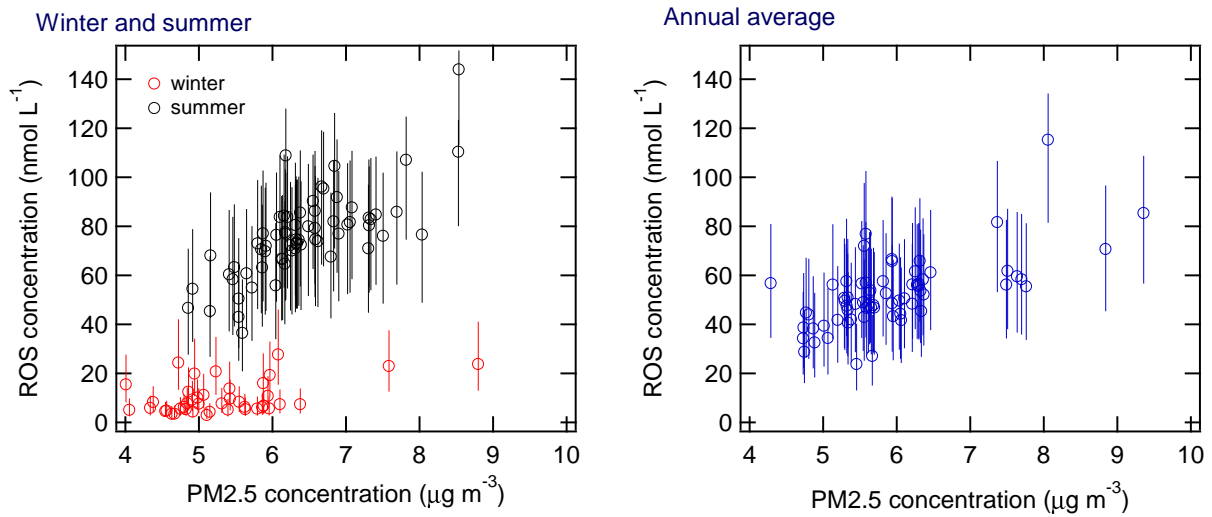

10  
11  
12  
13  
14  
15  
16  
17  
18

19 **Figure S5.** Relationships between winter and summer Fe and Cu and ROS generation estimated  
20 using the KM-SUB-ELF Model. Vertical lines indicate uncertainty bars.  
21

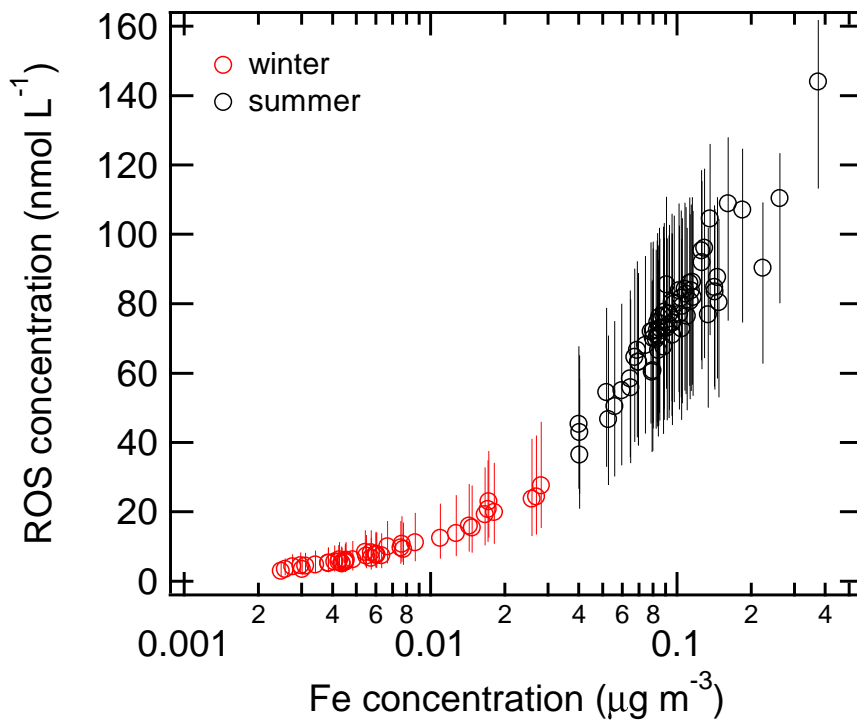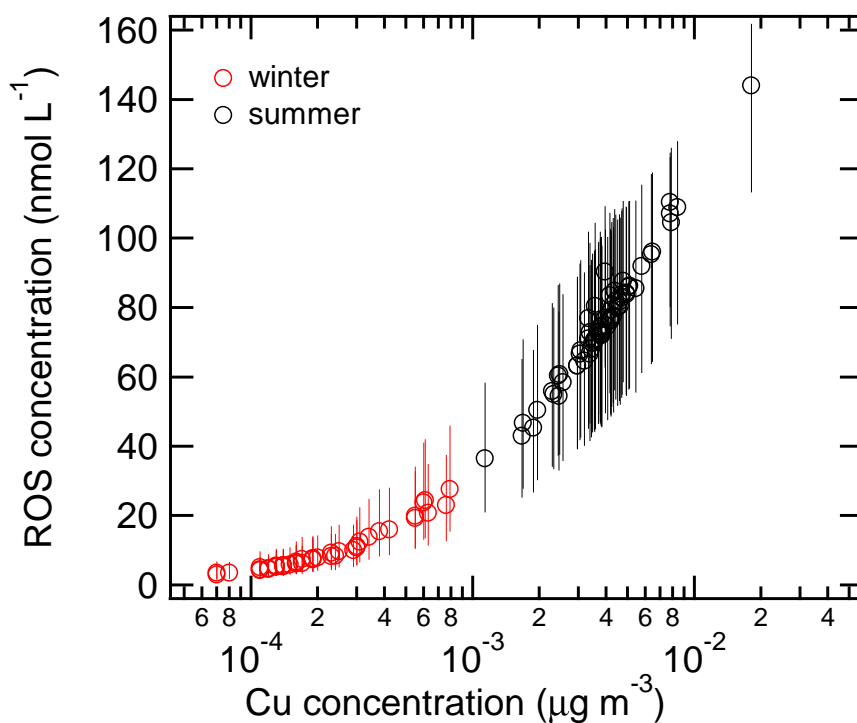

22

23 **Table S1.** Multivariable linear regression models used to predict winter data for Fe, Cu, and PM<sub>2.5</sub> for sites with missing winter data

| Winter<br>Parameter                       | Intercept | Summer<br>Parameter | Slope<br>(95% CI)             | Adjusted<br>R <sup>2</sup> | RMSE     | LOOCV          |          |
|-------------------------------------------|-----------|---------------------|-------------------------------|----------------------------|----------|----------------|----------|
|                                           |           |                     |                               |                            |          | R <sup>2</sup> | RMSE     |
| Fe (µg/m <sup>3</sup> )                   | 0.00590   | Fe                  | 0.251 (0.141, 0.360)          | 0.70                       | 0.0037   | 0.55           | 0.0048   |
|                                           |           | Cu                  | -4.37 (-6.59, -2.16)          |                            |          |                |          |
|                                           |           | Mg                  | 1.36 (0.541, 2.17)            |                            |          |                |          |
|                                           |           | Pb                  | 11.9 (5.82, 18.0)             |                            |          |                |          |
|                                           |           | Rb                  | -62.4 (-99.6, -25.2)          |                            |          |                |          |
|                                           |           | Si                  | -0.484 (-0.652, -0.317)       |                            |          |                |          |
| Cu (µg/m <sup>3</sup> )                   | 0.0000532 | Fe                  | 0.00774 (0.00471, 0.0108)     | 0.82                       | 0.000080 | 0.51           | 0.000094 |
|                                           |           | Cu                  | -0.101 (-0.154, -0.0485)      |                            |          |                |          |
|                                           |           | Mg                  | 0.0568 (0.0358, 0.0778)       |                            |          |                |          |
|                                           |           | Pb                  | 0.241 (0.106, 0.376)          |                            |          |                |          |
|                                           |           | Rb                  | -1.72 (-2.52, -0.913)         |                            |          |                |          |
|                                           |           | Si                  | -0.0132 (-0.0169, -0.00953)   |                            |          |                |          |
|                                           |           | Co                  | -0.531 (-0.882, -0.181)       |                            |          |                |          |
|                                           |           | Sb                  | 0.0217 (-0.0000746, 0.000181) |                            |          |                |          |
| PM <sub>2.5</sub><br>(µg/m <sup>3</sup> ) | 4.23      | Fe                  | 60.0 (42.4, 77.6)             | 0.73                       | 0.52     | 0.37           | 0.79     |
|                                           |           | Cu                  | -838 (-1135, -540)            |                            |          |                |          |
|                                           |           | Se                  | -3469 (-5249, -1689)          |                            |          |                |          |
|                                           |           | As                  | -129 (-247, -11.9)            |                            |          |                |          |
|                                           |           | Co                  | -2637 (-4727, -547)           |                            |          |                |          |
|                                           |           | Mg                  | 88.6 (-16.6, 193)             |                            |          |                |          |

24 All predictive models are based on data from 28 sites with both summer and winter data. LOOCV, Leave-one-out cross validation;  
 25 RMSE, root mean square error.

26 **Table S2.** Land use regression models for Fe, Cu, and ROS during summer in Toronto, Canada

| Exposure                 | Intercept | Parameter                     | Slope<br>(95% CI)           | Adjusted<br>R <sup>2</sup> | RMSE  | LOOCV          |       |
|--------------------------|-----------|-------------------------------|-----------------------------|----------------------------|-------|----------------|-------|
|                          |           |                               |                             |                            |       | R <sup>2</sup> | RMSE  |
| Fe/PM <sub>2.5</sub> (%) | 1.57      | Distance to City Center (m)   | 0.191 (-0.0655, 0.448)      | 0.68                       | 0.33  | 0.53           | 0.40  |
|                          |           | Distance to Airport (YYZ) (m) | -0.188 (-0.407, 0.0312)     |                            |       |                |       |
|                          |           | Industrial land use (300 m)   | 0.239 (0.0555, 0.422)       |                            |       |                |       |
|                          |           | Length of Major Roads (100 m) | 0.302 (0.0972, 0.508)       |                            |       |                |       |
|                          |           | Length of Highways (300 m)    | 0.737 (0.571, 0.902)        |                            |       |                |       |
|                          |           | Length of Bus Routes (200m)   | 0.157 (-0.0477, 0.362)      |                            |       |                |       |
|                          |           | Length of Rail (1000 m)       | 0.389 (0.172, 0.605)        |                            |       |                |       |
| Cu/PM <sub>2.5</sub> (%) | 0.0643    | Distance to Highway (m)       | -0.00526 (-0.0117, 0.00117) | 0.81                       | 0.011 | 0.77           | 0.013 |
|                          |           | Distance to Airport (YYZ) (m) | -0.0100 (-0.0159, -0.00408) |                            |       |                |       |
|                          |           | Length of Major Roads (100 m) | 0.00794 (0.00196, 0.0139)   |                            |       |                |       |
|                          |           | Length of Highways (300 m)    | 0.0322 (0.0237, 0.0407)     |                            |       |                |       |
|                          |           | Traffic counts (500 m)        | 0.0126 (0.00361, 0.0217)    |                            |       |                |       |
| ROS (nmol/L)             | 77.0      | Distance to Highway (m)       | -6.11 (-12.2, -0.000814)    | 0.64                       | 10.1  | 0.56           | 11.1  |
|                          |           | Distance to Airport (YYZ) (m) | -9.68 (-15.2, -4.20)        |                            |       |                |       |
|                          |           | Length of Bus Routes (1000 m) | -8.33 (-15.4, -1.25)        |                            |       |                |       |
|                          |           | Length of Highways (300 m)    | 9.81 (2.42, 17.2)           |                            |       |                |       |
|                          |           | Population Density (100 m)    | 5.42 (-0.311, 11.1)         |                            |       |                |       |
|                          |           | Length of Rail (1000 m)       | 6.77 (1.19, 12.4)           |                            |       |                |       |
|                          |           | Traffic counts (500 m)        | 10.7 (2.62, 18.8)           |                            |       |                |       |

27 All regression coefficients reflect a 1-unit change in standardized variables (divided by 2 x standard deviation). LOOCV, Leave-one-out cross validation; RMSE,  
 28 root mean square error.

29  
 30  
 31  
 32



33 **Table S3.** Land use regression models for annual mean Fe, Cu, and ROS in Toronto, Canada

| Exposure                 | Intercept | Parameter                      | Slope<br>(95% CI)            | Adjusted<br>R <sup>2</sup> | RMSE   | LOOCV<br>R <sup>2</sup> | LOOCV<br>RMSE |
|--------------------------|-----------|--------------------------------|------------------------------|----------------------------|--------|-------------------------|---------------|
| Fe/PM <sub>2.5</sub> (%) | 0.960     | Distance to rail line (m)      | -0.169 (-0.268, -0.070)      | 0.72                       | 0.158  | 0.68                    | 0.169         |
|                          |           | Distance to City Center (m)    | 0.315 (0.153, 0.477)         |                            |        |                         |               |
|                          |           | Distance to Airport (YYZ) (m)  | -0.183 (-0.283, -0.0823)     |                            |        |                         |               |
|                          |           | Length of Major Roads (100 m)  | 0.164 (0.0815, 0.246)        |                            |        |                         |               |
|                          |           | Length of Highways (300 m)     | 0.378 (0.298, 0.459)         |                            |        |                         |               |
|                          |           | Population Density (100 m)     | 0.159 (0.0591, 0.260)        |                            |        |                         |               |
|                          |           | Maximum Building Height (700m) | -0.153 (-0.259, -0.0467)     |                            |        |                         |               |
| Cu/PM <sub>2.5</sub> (%) | 0.0385    | Distance to highway (m)        | -0.00258 (-0.00658, 0.00142) | 0.81                       | 0.0068 | 0.79                    | 0.0071        |
|                          |           | Distance to City Center (m)    | 0.00703 (0.00157, 0.0125)    |                            |        |                         |               |
|                          |           | Distance to Airport (YYZ) (m)  | -0.00905 (-0.0133, -0.00480) |                            |        |                         |               |
|                          |           | Length of Major Roads (200 m)  | 0.00276 (-0.00113, 0.00665)  |                            |        |                         |               |
|                          |           | Length of Highways (300 m)     | 0.0156 (0.0104, 0.0208)      |                            |        |                         |               |
|                          |           | Population Density (100 m)     | 0.00584 (0.00154, 0.0101)    |                            |        |                         |               |
|                          |           | Traffic counts (500 m)         | 0.00969 (0.00379, 0.0156)    |                            |        |                         |               |
| ROS (nmol/L)             | 53.1      | Distance to rail line (m)      | -5.28 (-10.3, -0.267)        | 0.71                       | 7.51   | 0.65                    | 8.20          |
|                          |           | Distance to City Center (m)    | 5.55 (-0.958, 12.1)          |                            |        |                         |               |
|                          |           | Distance to Airport (YYZ) (m)  | -7.27 (-12.1, -2.39)         |                            |        |                         |               |
|                          |           | Industrial land use (200 m)    | 6.47 (1.40, 11.5)            |                            |        |                         |               |
|                          |           | Length of Major Roads (100 m)  | 8.74 (4.82, 12.7)            |                            |        |                         |               |
|                          |           | Length of Highways (300 m)     | 17.4 (13.4, 21.4)            |                            |        |                         |               |
|                          |           | Population Density (100 m)     | 7.35 (2.64, 12.1)            |                            |        |                         |               |
|                          |           | Residential land use (300m)    | 4.57 (-0.519, 9.66)          |                            |        |                         |               |

34 All regression coefficients (i.e. slopes) reflect a 1-unit change in standardized variables (divided by 2 x standard deviation). LOOCV, Leave-one-out cross  
 35 validation; RMSE, root mean square error.

36 **Table S4.** Land use regression models for summer and annual mean ln(Fe) in Toronto, Canada

| Exposure      | Intercept | Parameter                      | Slope<br>(95% CI)        | Adjusted<br>R <sup>2</sup> | RMSE  | LOOCV          |       |
|---------------|-----------|--------------------------------|--------------------------|----------------------------|-------|----------------|-------|
|               |           |                                |                          |                            |       | R <sup>2</sup> | RMSE  |
| <i>Summer</i> |           |                                |                          |                            |       |                |       |
| ln(Fe)        | -2.35     | Distance to Airport (YYZ) (m)  | -0.137 (-0.277, 0.00176) | 0.59                       | 0.255 | 0.49           | 0.283 |
|               |           | Industrial land use (300 m)    | 0.187 (0.0414, 0.332)    |                            |       |                |       |
|               |           | Length of Major Roads (100 m)  | 0.225 (0.0661, 0.383)    |                            |       |                |       |
|               |           | Length of Highways (300 m)     | 0.365 (0.237, 0.493)     |                            |       |                |       |
|               |           | Length of Bus Routes (200m)    | 0.0995 (-0.0577, 0.257)  |                            |       |                |       |
|               |           | Length of Rail (1000 m)        | 0.135 (-0.0541, 0.324)   |                            |       |                |       |
|               |           | Road Junctions (1000 m)        | 0.103 (-0.0894, 0.295)   |                            |       |                |       |
| <i>Annual</i> |           |                                |                          |                            |       |                |       |
| ln(Fe)        | -2.91     | Distance to rail line (m)      | -0.261 (-0.417, -0.105)  | 0.55                       | 0.250 | 0.46           | 0.272 |
|               |           | Distance to City Center (m)    | 0.311 (0.0582, 0.564)    |                            |       |                |       |
|               |           | Distance to Airport (YYZ) (m)  | -0.224 (-0.382, -0.0652) |                            |       |                |       |
|               |           | Length of Major Roads (100 m)  | 0.249 (0.119, 0.379)     |                            |       |                |       |
|               |           | Length of Highways (300 m)     | 0.289 (0.162, 0.415)     |                            |       |                |       |
|               |           | Population Density (100 m)     | 0.200 (0.0434, 0.356)    |                            |       |                |       |
|               |           | Maximum Building Height (700m) | -0.151 (-0.319, 0.0161)  |                            |       |                |       |

37 All regression coefficients reflect a 1-unit change in standardized variables (divided by 2 x standard deviation). LOOCV, Leave-one-out cross validation; RMSE,  
38 root mean square error.

**Table S5.** Land use regression models for summer and annual mean ln(Cu) in Toronto, Canada

| Exposure      | Intercept | Parameter                     | Slope<br>(95% CI)        | Adjusted R <sup>2</sup> | RMSE  | LOOCV          |       |
|---------------|-----------|-------------------------------|--------------------------|-------------------------|-------|----------------|-------|
|               |           |                               |                          |                         |       | R <sup>2</sup> | RMSE  |
| <i>Summer</i> |           |                               |                          |                         |       |                |       |
| ln(Cu)        | -5.56     | Distance to Highway (m)       | -0.126 (-0.269, 0.0173)  | 0.62                    | 0.256 | 0.60           | 0.262 |
|               |           | Distance to Airport (YYZ) (m) | -0.252 (-0.384, -0.120)  |                         |       |                |       |
|               |           | Length of Major Roads (100 m) | 0.187 (0.0538, 0.320)    |                         |       |                |       |
|               |           | Length of Highways (300 m)    | 0.236 (0.0475, 0.425)    |                         |       |                |       |
|               |           | Traffic counts (500 m)        | 0.265 (0.0636, 0.465)    |                         |       |                |       |
| <i>Annual</i> |           |                               |                          |                         |       |                |       |
| ln(Cu)        | -6.15     | Distance to highway (m)       | -0.0948 (-0.247, 0.0571) | 0.58                    | 0.258 | 0.51           | 0.277 |
|               |           | Distance to City Center (m)   | 0.123 (-0.0850, 0.330)   |                         |       |                |       |
|               |           | Distance to Airport (YYZ) (m) | -0.285 (-0.447, -0.124)  |                         |       |                |       |
|               |           | Length of Major Roads (200 m) | 0.108 (-0.0398, 0.256)   |                         |       |                |       |
|               |           | Length of Highways (300 m)    | 0.221 (0.02260.419)      |                         |       |                |       |
|               |           | Population Density (100 m)    | 0.193 (0.0294, 0.356)    |                         |       |                |       |
|               |           | Traffic counts (500 m)        | 0.215 (-0.00947, 0.439)  |                         |       |                |       |

All regression coefficients reflect a 1-unit change in standardized variables (divided by 2 x standard deviation). LOOCV, Leave-one-out cross validation; RMSE, root mean square error.
